# Supplementary material for: Negative regulation of conserved RSL class I bHLH transcription factors evolved independently among land plants
Source: eLife journal article supplement (doi:10.7554/elife.38529), 2018-08-23

MpFRH1 stem-loop RT-PCR

no RT control

100bp  
ladder

WT  
f

WT  
m

*FRH1*<sup>GOF1</sup>

*FRH1*<sup>GOF2</sup>

*FRH1*<sup>GOF3</sup>

WT  
f

WT  
m

*FRH1*<sup>GOF1</sup>

*FRH1*<sup>GOF2</sup>

*FRH1*<sup>GOF3</sup>

no  
DNA

tRNA  
loading  
control

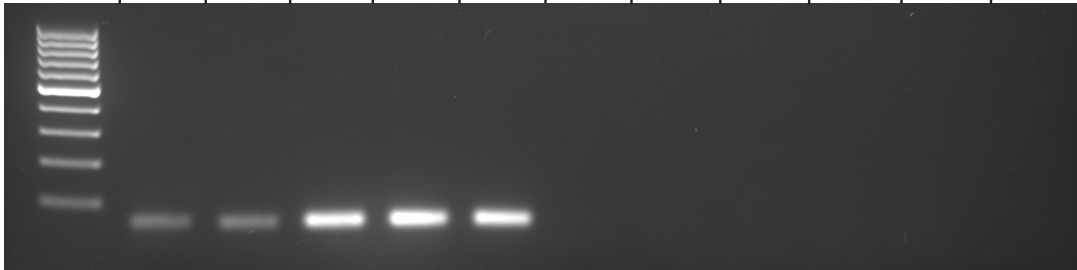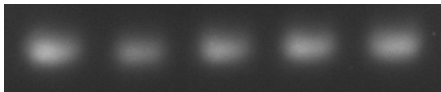

Supplement: supp [file elife-38529-supp-v1.zip]
