# Supplementary material for: Negative regulation of conserved RSL class I bHLH transcription factors evolved independently among land plants
Source: eLife journal article supplement (doi:10.7554/elife.38529), 2018-08-23
Supplement: supp [file elife-38529-supp-v1.zip]

**A** FRH1 miRNA 3' UGUAACCGGAGAAGAGUGUGU 5'  
 MpRSL1<sup>WT</sup> 5' UCAUGGGCCUCUUCUCUCACA 3'

\* cleavage site

**B** FRH1 miRNA 3' UGUAACCGGAGAAGAGUGUGU 5'  
 MpRSL1<sup>res</sup> 5' UCGUGGGCCAGUAGUUUGGACA 3'

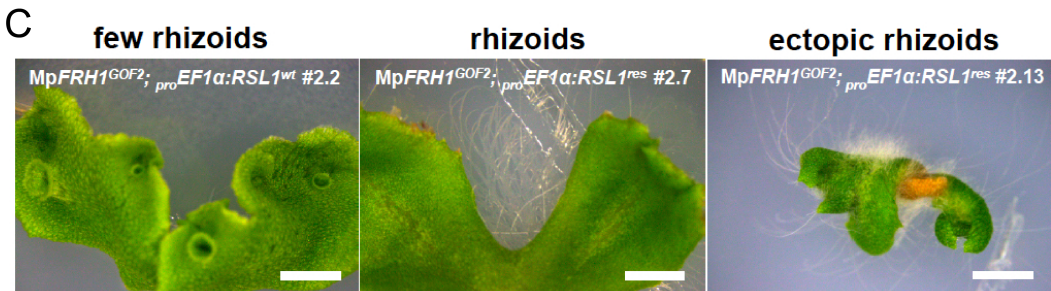

**D**

|                                                                  | no/few<br>rhizoids | rhizoids | ectopic<br>rhizoids | full gemma<br>cups | few<br>gemmae in<br>gemma<br>cups | no gemma<br>cups |
|------------------------------------------------------------------|--------------------|----------|---------------------|--------------------|-----------------------------------|------------------|
| MpFRH1 <sup>GOF2</sup> ; <sub>pro</sub> EF1α:RSL1 <sup>wt</sup>  | 25                 | 1        | 0                   | 0                  | 12                                | 0                |
| MpFRH1 <sup>GOF2</sup> ; <sub>pro</sub> EF1α:RSL1 <sup>res</sup> | 1                  | 7        | 2                   | 3                  | 2                                 | 5                |
