# Supplementary material for: Negative regulation of conserved RSL class I bHLH transcription factors evolved independently among land plants
Source: eLife journal article supplement (doi:10.7554/elife.38529), 2018-08-23
Supplement: supp [file elife-38529-supp-v1.zip]

2390 2400 2410 2420 2430 2440 2450

*Marchantia\_polymorpha\_Mapoly00* AGGAGGATGCT TGTGTACGAC ACTTGGCGACCA TCGAGGCTCGGA CAAAA  
*Marchantia\_paleacea\_onekp:HWO* AGGAAGATGCT TGTGTACGAC ACTTGGCGACCA TCGAGGCTCGGA CAAAA  
*Marchantia\_emarginata\_onekp:TF* CCGAATATCGA TGTGTACGAA ACTTGGCGGCCA TCGAGGCTCGGA CAAAA  
*Conocephalum\_conicum\_onekp:ILB* AGGATATGCA TGTGTACGAA TCTTTGGCGCCA TCGAGGCTCGGA CAGAA  
*Junularia\_cruciata\_onekp:TXVB* AGGAAATGCT TGTGTACGAC ACATGGCGGCCA TCGAGGCTCGGA CAAAT  
*Riccia\_berghiana\_onekp:WJLO\_s* AGGAAATGCT TGTGTACGAC ACATGGCGGCCA TCGAGGCTCGGA CAAAT  
*Barbilophozia\_barbata\_onekp:OF* CCGCCAGC AGCTCTAGGCTTGGCAACAGTC  
*Odontoschisma\_prostratum\_onekp* CCGCCAGC AGCTCTAGGCTTGGCAACAGTC  
*Calypogeia\_fissa\_onekp:RTMU\_sc* GACTGCAATC  
*Porella\_pinnata\_onekp:UUHD\_sca* CTTAGAGCGGTTGGAACTGAAAC  
*Metzgeria\_craspiilis\_onekp:NR* ATGACGAGGCTCAGAGGTGTATCTTC TGTCTTGGCTGCTCT TCGAGGCTTGGCAATCAGTC  
*Pellia\_neesiana\_onekp:JHFI\_sca* CTGTGCTGGGCAAGCTGTGTCTGACTCCCC TGACCTGGCGGCC -CAACCTCCAGTCTCATGT

2460 2470 2480 2490 2500 2510 2520

*Marchantia\_polymorpha\_Mapoly00* CCATGCGCTTGATTCGGTACCCGAGACCGATTC TAGGAAGCGA TTTCTCCAGATGAGTCTG GGGCA  
*Marchantia\_paleacea\_onekp:HWO* CCATGCGCTTGATTCGGTACCCGAGACCGATTC TAGGAAGCGA TTTCTCCAGATGAGTCTG GGGCA  
*Marchantia\_emarginata\_onekp:TF* CCATGCGCTTGATTCGGTACCCGAGACCGATTC TAGGAAGCGA TTTCTCCAGATGAGTCTG GGGCA  
*Conocephalum\_conicum\_onekp:ILB* CCATGCGCTTGATTCGGTACCCGAGACCGATTC TAGGAAGCGA TTTCTCCAGATGAGTCTG GGGCA  
*Junularia\_cruciata\_onekp:TXVB* CCATGCGCTTGATTCGGTACCCGAGACCGATTC TAGGAAGCGA TTTCTCCAGATGAGTCTG GGGCA  
*Riccia\_berghiana\_onekp:WJLO\_s* CCATGCGCTTGATTCGGTACCCGAGACCGATTC TAGGAAGCGA TTTCTCCAGATGAGTCTG GGGCA  
*Barbilophozia\_barbata\_onekp:OF* CATCTCCGTTGACCTAGTACTGGGAGCAGCTCAGGGAAGCGA TTTCTCCAGATGAGTCTG GGGCA  
*Odontoschisma\_prostratum\_onekp* CATCTCCGTTGACCTAGTACTGGGAGCAGCTCAGGGAAGCGA TTTCTCCAGATGAGTCTG GGGCA  
*Calypogeia\_fissa\_onekp:RTMU\_sc* TCTCTCTCGGAGCGTAGTCTCTGGGAGCAGCTCAGGGAAGCGA TTTCTCCAGATGAGTCTG GGGCA  
*Porella\_pinnata\_onekp:UUHD\_sca* CGTTTCCATGGATCTAGTGTGGGAGCAGCTCAGGAAGCGA TTTCTCCAGATGAGTCTG GGGCA  
*Metzgeria\_craspiilis\_onekp:NR* TATCTCAGCAGTCTAGTGTCCCGGGAGCAGCTCAGGGAAGCGA TTTCTCCAGATGAGTCTG GGGCA  
*Pellia\_neesiana\_onekp:JHFI\_sca* TGTGTATCCGCTCATGTCTCATCTTAGC GAGTCAAGGAAGCGT TTTCTCCAGATGGGCTTCCAGGGCA

2530 2540 2550 2560 2570 2580 2590

*Marchantia\_polymorpha\_Mapoly00* C CCAACGAT A CGAATCACAAGCGCGTGCATTGGACACAGTCTCCAAAGCTGCAGACA A  
*Marchantia\_paleacea\_onekp:HWO* C CCAACGAT A CGAATCACAAGCGCGTGCATTGGACACAGTCTCCAAAGCTGCAGACA A  
*Marchantia\_emarginata\_onekp:TF* C CCAAGTGAT A CCAATCACAAGCGCGTGCATTGGATACAGTCTCTAAATGTCAGACA A  
*Conocephalum\_conicum\_onekp:ILB* C CCAAGTGAT A CCAATCACAAGCGCGTGCATTGGATACAGTCTCTAAATGTCAGACA A  
*Junularia\_cruciata\_onekp:TXVB* C CCAAGTGAT A CCAATCACAAGCGCGTGCATTGGATACAGTCTCTAAATGTCAGACA A  
*Riccia\_berghiana\_onekp:WJLO\_s* C CCAAGTGAT A CCAATCACAAGCGCGTGCATTGGATACAGTCTCTAAATGTCAGACA A  
*Barbilophozia\_barbata\_onekp:OF* C CCAAGTGAT A CCAATCACAAGCGCGTGCATTGGATACAGTCTCTAAATGTCAGACA A  
*Odontoschisma\_prostratum\_onekp* C CCAAGTGAT A CCAATCACAAGCGCGTGCATTGGATACAGTCTCTAAATGTCAGACA A  
*Calypogeia\_fissa\_onekp:RTMU\_sc* C CCAAGTGAT A CCAATCACAAGCGCGTGCATTGGATACAGTCTCTAAATGTCAGACA A  
*Porella\_pinnata\_onekp:UUHD\_sca* C CCAAGTGAT A CCAATCACAAGCGCGTGCATTGGATACAGTCTCTAAATGTCAGACA A  
*Metzgeria\_craspiilis\_onekp:NR* C CCAAGTGAT A CCAATCACAAGCGCGTGCATTGGATACAGTCTCTAAATGTCAGACA A  
*Pellia\_neesiana\_onekp:JHFI\_sca* C CCAAGTGAT A CCAATCACAAGCGCGTGCATTGGATACAGTCTCTAAATGTCAGACA A

2600 2610 2620 2630 2640 2650 2660

*Marchantia\_polymorpha\_Mapoly00* C GGTTCGGCTTACCACCTCTA AAGCGCTCATCTCATGGGCTCTTCTCTCACA TCCACTGTCTTAAGAC  
*Marchantia\_paleacea\_onekp:HWO* C GGTTCGGCTTACCACCTCTA AAGCGCTCATCTCATGGGCTCTTCTCTCACA TCCACTGTCTTAAGAC  
*Marchantia\_emarginata\_onekp:TF* C GGTTCGGCTTACCACCTCTA AAGCGCTCATCTCATGGGCTCTTCTCTCACA TCCACTGTCTTAAGAC  
*Conocephalum\_conicum\_onekp:ILB* C GGTTCGGCTTACCACCTCTA AAGCGCTCATCTCATGGGCTCTTCTCTCACA TCCACTGTCTTAAGAC  
*Junularia\_cruciata\_onekp:TXVB* C GGTTCGGCTTACCACCTCTA AAGCGCTCATCTCATGGGCTCTTCTCTCACA TCCACTGTCTTAAGAC  
*Riccia\_berghiana\_onekp:WJLO\_s* C GGTTCGGCTTACCACCTCTA AAGCGCTCATCTCATGGGCTCTTCTCTCACA TCCACTGTCTTAAGAC  
*Barbilophozia\_barbata\_onekp:OF* C GGTTCGGCTTACCACCTCTA AAGCGCTCATCTCATGGGCTCTTCTCTCACA TCCACTGTCTTAAGAC  
*Odontoschisma\_prostratum\_onekp* C GGTTCGGCTTACCACCTCTA AAGCGCTCATCTCATGGGCTCTTCTCTCACA TCCACTGTCTTAAGAC  
*Calypogeia\_fissa\_onekp:RTMU\_sc* C GGTTCGGCTTACCACCTCTA AAGCGCTCATCTCATGGGCTCTTCTCTCACA TCCACTGTCTTAAGAC  
*Porella\_pinnata\_onekp:UUHD\_sca* C GGTTCGGCTTACCACCTCTA AAGCGCTCATCTCATGGGCTCTTCTCTCACA TCCACTGTCTTAAGAC  
*Metzgeria\_craspiilis\_onekp:NR* C GGTTCGGCTTACCACCTCTA AAGCGCTCATCTCATGGGCTCTTCTCTCACA TCCACTGTCTTAAGAC  
*Pellia\_neesiana\_onekp:JHFI\_sca* C GGTTCGGCTTACCACCTCTA AAGCGCTCATCTCATGGGCTCTTCTCTCACA TCCACTGTCTTAAGAC

2670 2680 2690 2700 2710 2720 2730

*Marchantia\_polymorpha\_Mapoly00* TGTAGAGCCGCAATTAACCTGGGCTTGTACCTTACACAAGCTCGAATTCAGACATGCCGTCGGGCC  
*Marchantia\_paleacea\_onekp:HWO* TGTAGAGCCGCAATTAACCTGGGCTTGTACCTTACACAAGCTCGAATTCAGACATGCCGTCGGGCC  
*Marchantia\_emarginata\_onekp:TF* TGTAGAGCCGCAATTAACCTGGGCTTGTACCTTACACAAGCTCGAATTCAGACATGCCGTCGGGCC  
*Conocephalum\_conicum\_onekp:ILB* TGTAGAGCCGCAATTAACCTGGGCTTGTACCTTACACAAGCTCGAATTCAGACATGCCGTCGGGCC  
*Junularia\_cruciata\_onekp:TXVB* TGTAGAGCCGCAATTAACCTGGGCTTGTACCTTACACAAGCTCGAATTCAGACATGCCGTCGGGCC  
*Riccia\_berghiana\_onekp:WJLO\_s* TGTAGAGCCGCAATTAACCTGGGCTTGTACCTTACACAAGCTCGAATTCAGACATGCCGTCGGGCC  
*Barbilophozia\_barbata\_onekp:OF* TGTAGAGCCGCAATTAACCTGGGCTTGTACCTTACACAAGCTCGAATTCAGACATGCCGTCGGGCC  
*Odontoschisma\_prostratum\_onekp* TGTAGAGCCGCAATTAACCTGGGCTTGTACCTTACACAAGCTCGAATTCAGACATGCCGTCGGGCC  
*Calypogeia\_fissa\_onekp:RTMU\_sc* TGTAGAGCCGCAATTAACCTGGGCTTGTACCTTACACAAGCTCGAATTCAGACATGCCGTCGGGCC  
*Porella\_pinnata\_onekp:UUHD\_sca* TGTAGAGCCGCAATTAACCTGGGCTTGTACCTTACACAAGCTCGAATTCAGACATGCCGTCGGGCC  
*Metzgeria\_craspiilis\_onekp:NR* TGTAGAGCCGCAATTAACCTGGGCTTGTACCTTACACAAGCTCGAATTCAGACATGCCGTCGGGCC  
*Pellia\_neesiana\_onekp:JHFI\_sca* TGTAGAGCCGCAATTAACCTGGGCTTGTACCTTACACAAGCTCGAATTCAGACATGCCGTCGGGCC

2740 2750 2760 2770 2780 2790 2800

*Marchantia\_polymorpha\_Mapoly00* GCTTTGAACACCAATCTGAAGCCCGGAGCCCGGAGGCGAGTGCAGAAAGATCTCAGAGCATAGAGCTC  
*Marchantia\_paleacea\_onekp:HWO* GCTTTGAACACCAATCTGAAGCCCGGAGCCCGGAGGCGAGTGCAGAAAGATCTCAGAGCATAGAGCTC  
*Marchantia\_emarginata\_onekp:TF* GCTTTGAACACCAATCTGAAGCCCGGAGCCCGGAGGCGAGTGCAGAAAGATCTCAGAGCATAGAGCTC  
*Conocephalum\_conicum\_onekp:ILB* GCTTTGAACACCAATCTGAAGCCCGGAGCCCGGAGGCGAGTGCAGAAAGATCTCAGAGCATAGAGCTC  
*Junularia\_cruciata\_onekp:TXVB* GCTTTGAACACCAATCTGAAGCCCGGAGCCCGGAGGCGAGTGCAGAAAGATCTCAGAGCATAGAGCTC  
*Riccia\_berghiana\_onekp:WJLO\_s* GCTTTGAACACCAATCTGAAGCCCGGAGCCCGGAGGCGAGTGCAGAAAGATCTCAGAGCATAGAGCTC  
*Barbilophozia\_barbata\_onekp:OF* GCTTTGAACACCAATCTGAAGCCCGGAGCCCGGAGGCGAGTGCAGAAAGATCTCAGAGCATAGAGCTC  
*Odontoschisma\_prostratum\_onekp* GCTTTGAACACCAATCTGAAGCCCGGAGCCCGGAGGCGAGTGCAGAAAGATCTCAGAGCATAGAGCTC  
*Calypogeia\_fissa\_onekp:RTMU\_sc* GCTTTGAACACCAATCTGAAGCCCGGAGCCCGGAGGCGAGTGCAGAAAGATCTCAGAGCATAGAGCTC  
*Porella\_pinnata\_onekp:UUHD\_sca* GCTTTGAACACCAATCTGAAGCCCGGAGCCCGGAGGCGAGTGCAGAAAGATCTCAGAGCATAGAGCTC  
*Metzgeria\_craspiilis\_onekp:NR* GCTTTGAACACCAATCTGAAGCCCGGAGCCCGGAGGCGAGTGCAGAAAGATCTCAGAGCATAGAGCTC  
*Pellia\_neesiana\_onekp:JHFI\_sca* GCTTTGAACACCAATCTGAAGCCCGGAGCCCGGAGGCGAGTGCAGAAAGATCTCAGAGCATAGAGCTC
