# Supplementary material for: Negative regulation of conserved RSL class I bHLH transcription factors evolved independently among land plants
Source: eLife journal article supplement (doi:10.7554/elife.38529), 2018-08-23
Supplement: supp [file elife-38529-supp-v1.zip]

|                                               | rhizoids | few rhizoids | no/very few rhizoids | total |
|-----------------------------------------------|----------|--------------|----------------------|-------|
| <b><i>WT</i> control (<i>pro35S:HygR</i>)</b> | 103      | 5            | 0                    | 108   |
| <b><i>proACT:MpFRH1</i></b>                   | 4        | 11           | 88                   | 103   |
| <b><i>proACT:MpFRH1<sup>miRNA</sup></i></b>   | 18       | 32           | 59                   | 109   |
| <b><i>proACT:MpFRH1<sup>noATG</sup></i></b>   | 7        | 14           | 83                   | 104   |
| <b><i>proACT:MpFRH1<sup>PSORF1</sup></i></b>  | 102      | 6            | 0                    | 108   |
| <b><i>proACT:MpFRH1<sup>PSORF2</sup></i></b>  | 106      | 3            | 0                    | 109   |
