# Supplementary material for: Negative regulation of conserved RSL class I bHLH transcription factors evolved independently among land plants
Source: eLife journal article supplement (doi:10.7554/elife.38529), 2018-08-23
Supplement: supp [file elife-38529-supp-v1.zip]

Archive with 15 entries (15 files):
- elife_poa_e38529_Supplementary_File_4.pdf
- elife_poa_e38529_Figure_5_figure_supplement_1.pdf
- elife_poa_e38529_Supplementary_File_5.docx
- elife_poa_e38529_Figure_4_figure_supplement_1.pdf
- elife_poa_e38529_Figure_1_figure_supplement_1.pdf
- elife_poa_e38529_Figure_3_figure_supplement_1.pdf
- elife_poa_e38529_Figure_3_figure_supplement_3.pdf
- elife_poa_e38529_Supplementary_File_3.rtf
- elife_poa_e38529_Supplementary_File_2.txt
- elife_poa_e38529_Figure_3_figure_supplement_2.pdf
- elife_poa_e38529_Figure_7_figure_supplement_1.pdf
- elife_poa_e38529_Figure_8_figure_supplement_1.pdf
- elife_poa_e38529_Transparent_Reporting_File.docx
- elife_poa_e38529_Supplementary_File_1.txt
- elife_poa_e38529_Figure_2_figure_supplement_1.pdf
