# Supplementary material for: Negative regulation of conserved RSL class I bHLH transcription factors evolved independently among land plants
Source: eLife journal article supplement (doi:10.7554/elife.38529), 2018-08-23
Supplement: supp [file elife-38529-supp-v1.zip]

|           | mutant |      | WT   |      | total |      | HygS:HygR | T-DNA      | Expected |       |
|-----------|--------|------|------|------|-------|------|-----------|------------|----------|-------|
| line name | HygR   | HygS | HygR | HygS | HygR  | HygS | ratio     | insertions | ratio    | p     |
| ST45-2    | 131    | 0    | 0    | 125  | 131   | 125  | 1:1.0     | 1          | 1:1      | 0.708 |
| ST49-10   | 109    | 0    | 48   | 53   | 157   | 53   | 1:3.0     | 2          | 1:3      | 0.936 |
