# Supplementary material for: Negative regulation of conserved RSL class I bHLH transcription factors evolved independently among land plants
Source: eLife journal article supplement (doi:10.7554/elife.38529), 2018-08-23
Supplement: supp [file elife-38529-supp-v1.zip]

| target                                                    | transcript<br>number | Mapoly gene ID         | score    |
|-----------------------------------------------------------|----------------------|------------------------|----------|
| foie gras domain containing protein                       | 35828                | Mapoly0075s0041        | 2.5      |
| <b>basic helix-loop-helix transcription factor MpRSL1</b> | <b>27126</b>         | <b>Mapoly0039s0003</b> | <b>4</b> |
| basix helix-loop-helix transcription factor               | 27676                | Mapoly0100s0033        | 4        |
| nucleotide-rhamnose synthase/epimerase-reductase          | 26174                | Mapoly0005s0120        | 4        |
