# Supplementary material for: Negative regulation of conserved RSL class I bHLH transcription factors evolved independently among land plants
Source: eLife journal article supplement (doi:10.7554/elife.38529), 2018-08-23
Supplement: supp [file elife-38529-supp-v1.zip › elife_poa_e38529_Supplementary_File_1.txt]

Supplemental file 1 TAIL-PCR bands

>ST21-1_RB
NNNNNNNNNNNGGGCGATTGGGNNNACGTCGCATGCTCCCGGCCGCCATGGCGGCCGCGGGAATTCGATTCCTGAATGGC
GAATGCTAGAGCAGCTTGAGCTTGGATCAGATTGTCGTTGCCCGCCTTCAGTTTAAACTATCAGTGTTTCCTCTTCATCC
GTGCACTGTGTTCGGCCCTTTGCGCGGACCCGCTCGCTTCCTATATAAATGCCCGCAGGCGCTCTTTCTCCCTCATCATT
CGGCACTCTCTTCTGTACAAATAAGTACTTCCATCAGCAGACGACATCAGTCTTGAACTTGCTCACTCATCTCCCCCTCC
CCCCTCCCCCCTCCCGCAGCCCTCAACAGCGCCATAGGGTCCCAGACCTCCCACTGGCCGGCCCCATCTGAACCTCTTCT
CTTCTCTCATCGGCTTCTCCCTAGACCTGCCCCGTAGTTCAGTCTAGCTAGCTCGGCTCGGCGTGGCGGGCGGTGGGGTA
GTTGGTTAGTCCAGTTCCGGTATAATTCCAGCGCTAGCAGTTGCTGGAGTTCGTGGTGATGGCGGTGGTGGTGTAGTAGT
AGTCATAGTGTACCGCATTAAGATCCTCTCTAGTCGCTTGAGCTGCGCCACGATTCTGCTCGTGCAGCAGCTTGGCTTGT
GGACGATTTGCGTCGTTCAGATCGAAATTCAACCAAAAGCTGCAGCACGAATTTTGGATTGGATGAGCAACCGCAGATAA
TAGATAGCACAGCCAAACAGCACCGCGTGGTGGCGGCCGTCACTGACACAGACAGATAGCGAGCTAGATAGATAGACAGA
TAGACAGAAATGTTGACATTCTCCAGGTTGCAGCAGGGAATTCGGCCACTTTCGGTTCTTGTGCTTGCACATTGGTCTCT
TCACGCACAAACATCGAACCCTTGTGGCATCTGTGTTTGTGTGAGAAGAGGCCAATGTCCAGCGGAGAAACCCCTTAAAT
TCGAGGACGATTCAGCCGCAGTCAGCAGCAGTGGTCAGTCAGAGTAAGTGGGTCTATGTTGTGCGTGAAACAGAACACAA
TTTTTCTCGTGCTNACGAGGTGGTGTCTTCTGAGATGAGCTCCANCGTCNTCNTCATCCATGGATCTTCACCTTCCTCAC
AGGGGNNCNTCNCCATCACTCGATAGACTGCCACGCAGTTTCTTGGGCTGCAAGCNGGCAANNNNGAGATTCTGNNCGGG
TNGGCGCNNNNNAGCCNTAGNTGNGNGCTCNGTTACAAACNNNCTCNNNANGGCCNGGGNNNCTGAANGATGCAATTCNT
ANAGACNCGTTNNCTNNTGCACNAACATNCNGNNTCNNN


>ST33-2_LB
NNNNNNNNNNNNAGCTCGCTGCCCTGCGCTTGGAAATCTGGCAAGTCTGACGTGCTCGCCTATCGTGCTTTCACGGCCAT
TCTCTAGACAACAGGTCTGCCACTGCTGCAGATCATGTCTGAGTAATTCAAGGCTGTCACATGTTGCACCTCAAATGTCA
CGTTCTTCATGATCGATATATAAGGCCTGAACTTACTAGCAGCAGATCTTGAGGTTTATGCCTCTGCTTGAAAACGGACT
TCTCGTACGCTAGGGCTGCCCCGGGTTCCACGATCGTGTCCGTGGCTGTCCTCGAGCAGTAATAAGTTGACAACAACCGG
ATGCTGGAACAATTGCGCGTCATTCTCCTGCTTTCCGACTTAATACGCACCTGTGCTTCGCGAATGCAGAGGATGATGCC
ATAACAATCTCATCCTGCCTTTCGCCGTCACGATCTCTCGACATCGGATCTCGCATTTGGAATATCATTCTCGGCTCTTC
GACTTAACTCCCACCCTGACGGGCTTCTGCAAAAAGTGACGCCAGCATAATCTCACGCGCCCGGCCCTGAGGCTTCACGA
GCTCGTCCCCCACAGATTCTTAGGTTTTGAATATTCAGATGACAGCTCTGATCCGGCCGCAGCTTTCACGTGCAACTCTG
CGACGCATTATGTCCAGATTTTCCCAAAGTTACTCGAGACGGCACATTTAAACAGGCGCAACTTCAGTCGTCGGCTCGCT
GGCTCCAATCCTCCAAATCGCTCTAAGTGTGCATCGGGTCCATTCGTGCCTTGAAAAGCTTTCTCCAGATTTGATTCATG
CCTCACGACCTCTTGTCGGTCTCATACGGTATCTTCTGTCCACGGTATTCGCCGGTCAGTAGTTCCTCGTGAAGCTCCTC
GTGTCTGACTCTAGTAACCCAGAGCCCCTGTAGGTTTCATAGACCCAGCCAGACATAAAGTAACACCGATAAGCTCTAGC
ATTTTGTTAATCTCCNGAAATTTGCTGCTCAATCTTGGCTTCCCTTNCTGACNTCACCGGGCGCCCCGAGATCAGAATCN
NNCAAAACTTATCGNANTANAAGTAAGTACCTCNTANNNCAAATTNNNACNNTNGANNTGATNANCATTCTNNNAAACCC
TTNNAANGAANGACGTTTCNNNCTTTCCTTNNACTTATTGATCCAATCAAATGNNCNGNNNNNNNNNATGGNNNAATGGN
NNAANNNNNTNNNNNNNNNCNNGGTNNNANTNAANANNNNNNNNN

>ST33-2_RB
NNNNNNACTNNNNATTGTCGTNNNCNCCTTCNGTTTAAACTATCAGTGTTTGAAGCTCTGGGTCGTAGAGAGGCGCTCCA
TTATCGTTGCGAAATACACATTAATGCAAATGAAAGGACACCTTTCTCGACTCGCACATCGTGACATATGAATTTAGGTC
GACATGTGAGAACGTGATCTTGTGACCGAAAACTCTAATTATGTGCCCACACAGTCGACTTCCTTTCACCGTCGTAGACT
GCCTGTGTGATTCCGCCTGACTTAGCCCCGAGCGCTGCTGCAACGTGAGCGTTTTAGTGCAAATCTCTGCCACTAATGAT
CCACACAAGGACAGAACGTGAGATATGAAGCACGACATGTCCGAACGTGAGATCCCCGTCACGGAAAAAGGAATCGACCT
TGTGCCACCCTCTCCCTGGATTGATCCAGGTTAATCAATCCCACCCATAAGCCCAATCACGGGCTCCGCTTCACATCGTC
AATCCTCTCTCTCTCTCTCTCTCTCTCTCTCTATAAAAGTGTGTGTNTCTTTCTTTCCTNTNTNAATNTANNTNTCTGTG
TGTGTGTGAGAAAAGANTTTNTCTCTCTCNACTGACTGAGTGGCTCTGCTGGCGCGCGGNGGCCCNCTCNCNCAANACAC
ACANGCNCGCGTGTNGNGAGAAGNGCAGTGTCCTCTGTATATNTCGNGCGCACANNCCGCCCCCCCCGAGATNNNANANT
CCNCGCGNGNCGNANNGAGAGNNNCGCGCGCGCGCNCTCTCCTCACACTNNGAGAGNGAGAGAGAGAGCNCCNCNCCGCG
NGTGAGGNGGGGGGNNNACTNANANCAGAGNNNAGAGATNTTCTCGCGCTNNNNACNCCACGCGCGCNCNNNNNNANATA
TACNNNCTCTNNAAANNNNGNNNGCGAGAGCGGGNNNCANNNGNNGNNNNNANNNNANNANNNCGC


>ST45-2_LB
NNNNNNNNNNGGGCGATTGGGNNNACGTCGCATGCTCCCGGCCGCCATGGCGGCCGCGGGAATTCGATTAGTACATTAAA
AACGTCCGCAATGTGTTATTAAGTTGTCTAAGCGTCAATTTGTTTACACCACAATATATCCTGGTTCGTGCCGACGAATT
AGACAGCGGACACTGCACTTCACCGGACACGACTGCCTTTGACTTGACCGGGACCGGACCACCGCGCCGCAGCAGCGCCA
GTCAGTCAGTAGAGTGAGAAATGCTCTTGTCCTACAGACACAGAGAATTGTAGATTCAGAAGGGAAAGAAAGATGCACGC
AGTTCTAGAGAGAGAGAGAGAGAGAGAGAGGATTGACGATGTGAAGCGGAGCCCGTGATTGGGCTTATGGGTGGGATTGA
TGAACCTGGATCAATCCAGGGAGAGGGTGGCACAAGGTCGATTCCTTTTTCCGTGACGGGGATCTCACGTTCGGACATGT
CGTGCTTCATCTCTCTCGACCAATCACTAGTGAATTCGCGGCCGCCTGCAGGTCGACCATATGGGAGAGCTCCCAACGCG
TTGGATGCATAGCTTGAGTATTCTATAGTGTCACCTAAATAGCTTGGCGTAATCATGGTCATAGCTGTTTCCTGTGTGAA
ATTGTTATCCGCTCACAATTCCACACAACATACGAGCCGGAAGCATAAAGTGTAAAGCCTGGGGTGCCTAATGAGTGAGC
TAACTCACATTAATTGCGTTGCGCTCACTGCCCGCTTTCCAGTCGGGAAACCTGTCGTGCCAGCTGCATTAATGAATCGG
CCAACGCGCGGGGAGAGGCGGTTTGCGTATTGGGCGCTCTTCCGCTTCCTCGCTCACTGACTCGCTGCGCTCGGTCGTTC
GGCTGCGGCGAGCGGTATCAGCTCACTCAAAGGCGGTAATACGGTTATCCACAGAATCAGGGGATAACGCANGAAAGAAC
ATGTGAGCAAAAGGNCAGCAAAAGGCCAGGAACCGTAAAAAGGCCGCGTTGCTGGCGTTTTTCCATAGGCTCCGCCCCCC
TGACGAGCATCACAAAAATCGACGCTCAAGTCAGANGTGGCGAAACCCGACAGGACTATAAAGATACCAGGCGTTTCCCC
CTGGAAGCTCCCTCGTGCGCTCTNCTGTNCNACCCTNCNCTTACCGGATACCTGTCNNCTTTCTCCCTTCGGGAGCGNGG
NNCTTCNNNNAGCTCACGCTGTAGNATCNCANTCGGNNNNNGTCNTCGCTCNAGCTGGGNNNNNGCANNAACCCCCGTTC
ANCCNACGNNGNNNNTATCNGNAACNTNTCGNNNNNANNCNA

>ST45-2_RB
NNNNNNNNNNATTGTCGTTTCCGCCTTCAGTTTAACTATCAGTGTTTGCGCGCGCAGTCGTCACAGTCGGGGAGGGGAAG
AGAGAGCGCAGCGCAGCGGCTGAGAGGGGAGGGGAACTAAGAGCTGAGAGCTGAGAGATTTTCACGTTCTGGAACACGAC
GGGCGCGCAATCCACGATAGATCCGCGCTGGCAAAAGGTGGCCAGGCGAGCAGGGGGCACATGGAGGGGGAAAATCGGAA
AATCGCGGTCCCATAAGCAGGGAAGGGTTAAGATTAGGGGCCGGGTTAGGGCTAAATATGGGGCGAGGGGAACAGAGTGG
CGCGGGAATGTTTAAGGGGCAAGTTAACAAAACTCCAGGCATTAACGGCAGTAGGCGACGTGGAAGGCTCGGGGAGGCGA
ACGTGAGGCCTCATAACTGCGCCCGAGTCCCACTTGGCGTTTAATACAGTGGTTGCTGCAGTGCTAAGGCCCTCATCTCC
TCCATCACTCCACCATATTTTTCATGCCTCTTCATCCGTGCACTGTGTTCGGCCCTTTGCGCGGACCCGCTCGCTTCCTA
TATAAATGCCCGCAGGCGCTCTTTCTCCCTCATCATTCGGCACTCTCTTCTGTACAAATAAGTACTTCCATCAGCAGACG
ACATCAGTCTTGAACTTGCTCACTCATCTCCCCCTCCCCCCTCCCCCCTCCCGCAGCCCTCAACAGCGCCATAGAGTCCC
AGACTTCCCACTGGCCGGCCCCATCTGAACCTCTTCTCTTCTCTCTCTGNNNCTCCACAA


>ST49-10_LB
NNNNNNNCTAGCGTCATTTGTTTACNCCACAATATATCCTGTGAAAATCTCTCAGCTCTCAGCTCTTAGTTCCCCTCCCC
TCTCAGCCGCTGCGCTGCGCTCTCTCTTCCCCTCCCCGACTGTGACGACTGCGCGCGCCTGCGACCTTCTCCCTGCGACC
TGCGACGATTATTAGCTCCGGGGGCGGTCGGTTCGTGCCGACGAATTAGACAGCGGACACTGCACTTCACCGGACACGAC
TGCCTTTGACTTGACCGGGACCGGACCACCGCGCCGCAGCAGCGCCAGTCAGTCAGTAGAGTGAGAAATGCTCTTGTCCT
ACAGACACAGAGAATTGTAGATTCAGAAGGGAAAGAAAGATGCACGCAGTTCTAGAGAGAGAGAGAGAGAGAGAGAGGAT
TGACTATGTGAAGCGGAGCCCGTGATTGGGCTTATGGGTGGGATTGATGAACCTGGATCAATCCGGGGAGAGGGTGGCAC
AGGGTCTATTCCTTTTTCCGTGACGGGGATCTCACGTTCGGACATGTCGTGCTTCNNNNNNCTCNAACANNNGCTNANGN
ATATAAGCTGGTGGGAGAAGATGAGGNCTGATTTGNAATGACGGACAGCCGGTATCAAGGGACCACCTATCGGTTCTTTG
CNNNNTGATGAGNAGCACAGTACGCAGCTGCTTGCCCAGGAGCTGTNGAGGGAGAACACCGCANCAACATGCTTAGCAAA
GGCTGTTGAGCCGGNTGNCCNCGTTGAAGCTTTAACAGCGNCNTGCAACTNCCCCCCNGAAGGAAGCTGTCTTCTCGCGT
ACACGTCCGACGCTGGAGAGGGACAATGGNNNNGNNGTTCCGGCGACGCNCAAGGCCCTCCCCCCCCCATTTTCTTCCTG
TCTGGNGTCGGANCGNGAAAAANCAACACCCCCCACNNCGGGNGGGNGGCGGNGCCTAGNANAAAANCGGCNCCGCNCGG
ATTTGGGGACNNGGGAGTCCCTTGNNCCATCACNCGGAATACCCATAAANGGNATNGGNTGAGGGTCGNNGNNTNTCNAC
AGCTNCCCGCNNNNCCGGGGGGCCGCCAGGCCTCNT

>ST49-10_RB
NNNNNNNNNNATGTCGTTTCCGCCTTCNGTTTAACTATCAGTGTTAGAGATACAATATATCCACAACGACGGGCGCGCAA
TCCACGATAGATCCGCGCTGGCAAAAGGTGGCCAGGCGAGCAGGGGGCACATGGAGGGGGAAAATCGGAAAATCGCGGTC
CCATAAGCAGGGAAGGGTTAAGATTAGGGGCCGGGTTAGGGCTAAATATGGGGCGAGGGGAACAGAGTGGCGCGGGAATG
TTTAAGGGGCAAGTTAACAAAACTCCAGGCATTAACGGCAGTAGGCGACGTGGAAGGCTCGGGGAGGCGAACGTGAGGCC
TCATAACTGCGCCCGAGTCCCACTTGGCGTTTAATACAGTGGTTGCTGCAGTGCTAAGGCCCTCATCTCCTCCATCACTC
CACCATATTTTTCATGCCTCTTCATCCGTGCACTGTGTTCGGCCCTTTGCGCGGACCCGCTCGCTTCCTATATAAATGCC
CGCAGGCGCTCTTTCTCCCTCATCATTCGGCACTCTCTTCTGTACAAATAAGTACTTCCATCAGCAGACGACATCAGTCT
TGAACTTGCTCACTCATCTCCCCCTCCCCCCTCCCCCCTCCCGCAGCCCTCAACAGCGCCATANAGTCCCAGACTTCCCA
CTGGCCGGCCCCATCTGAACCTCTTCTCTTCTCTTCTCTNNNNCTCNNCAANNNANTNN
