# Supplementary material for: Negative regulation of conserved RSL class I bHLH transcription factors evolved independently among land plants
Source: eLife journal article supplement (doi:10.7554/elife.38529), 2018-08-23
Supplement: supp [file elife-38529-supp-v1.zip › elife_poa_e38529_Supplementary_File_2.txt]

Supplemental file 2 MpFRH1 transcript

>MpFRH1_transcript
tcggcactctcttctgtacaaataagtacttccatcagcagacgacatcagtcttgaacttgctcactcatctccccctccc
ccctcccccctcccgcagccctcaacagcgccatagagtcccagacttcccactggccggccccatctgaacctcttctct
tctctcatcggcttctccctagacctgccccgtagttcagtctagctagctcggctcggcgtggcgggcggtggggtagtt
ggttagtccagttccggtataattccagcgctagcagttgctggagttcgtggtgatggtggtggtggtgtagtagtagtc
atagtgtaccgcattaagatcctctccagtcgcttgagctgcgccacgattctgctcgtgcagcagcttggcttgtggacg
atttgcgtcgttcagatcgaaattcaaccaaaagctgcagcacgaattttggattggatgagcaaccgcagataataga
tagcacagccaaacagcaccgcgtggtggcggccgtcactgacacagacagatagcgagctagatagatagacagat
agacagaaatcttgacattctccaggttgcagcagggaattcggccactttcggttcttgtgcttgcacattggtctcttc
acgcacaaacatcgaacccttgtggcatctgtgtttgtgtgagaagaggccaatctccaagcggaaaaaccccttaaat
tcgaggacgattcagccgcagtcagcagcagtggtcagtcagagtaagtgggtctatgttgtgcgtgaaacagaacac
aattttctcgtgctaacgaggtggtgtcttctgagatcagctccagcgtcatcctcatccatggatcctcaccttcctcaca
ggggatcatcaccatcactcggatagactgccacgcagttttctttggctgcaagcgggcaaagatcgagattctgcac
gggttggcgcactgtagccttaggatggcgtgctccagttacaaacatactcaggatggccaggggacactgaaggat
gcagattcgtagagactccgttcactgatgcaccgaacttgggagctcggatcacaccctcgtgcactcaccacaccgg
caggaggattgattgagaatctagatttgtgctgcagcccccgagctgtatggaattcattacccgtcaataaatttgctt
tgcc
