# Supplementary material for: Negative regulation of conserved RSL class I bHLH transcription factors evolved independently among land plants
Source: eLife journal article supplement (doi:10.7554/elife.38529), 2018-08-23

Supplemental file 4. Multiple sequence alignments of the predicted MpFRH1 miRNA target mRNAs in *M. polymorpha* and their orthologs from other liverworts. The predicted MpFRH1 target site is indicated with a grey arrow. Region around the predicted miRNA target site (top) and overview of the alignment (bottom). A) Foie gras domain containing protein Mapoly0075s0041.1. B) Basic helix-loop-helix transcription factor MpRSL1 Mapoly0039s003 C) Basic helix-loop-helix transcription factor transcript 27676 D) Nucleotide-rhamnose synthase/epimerase-reductase Mapoly0005s0120.

A

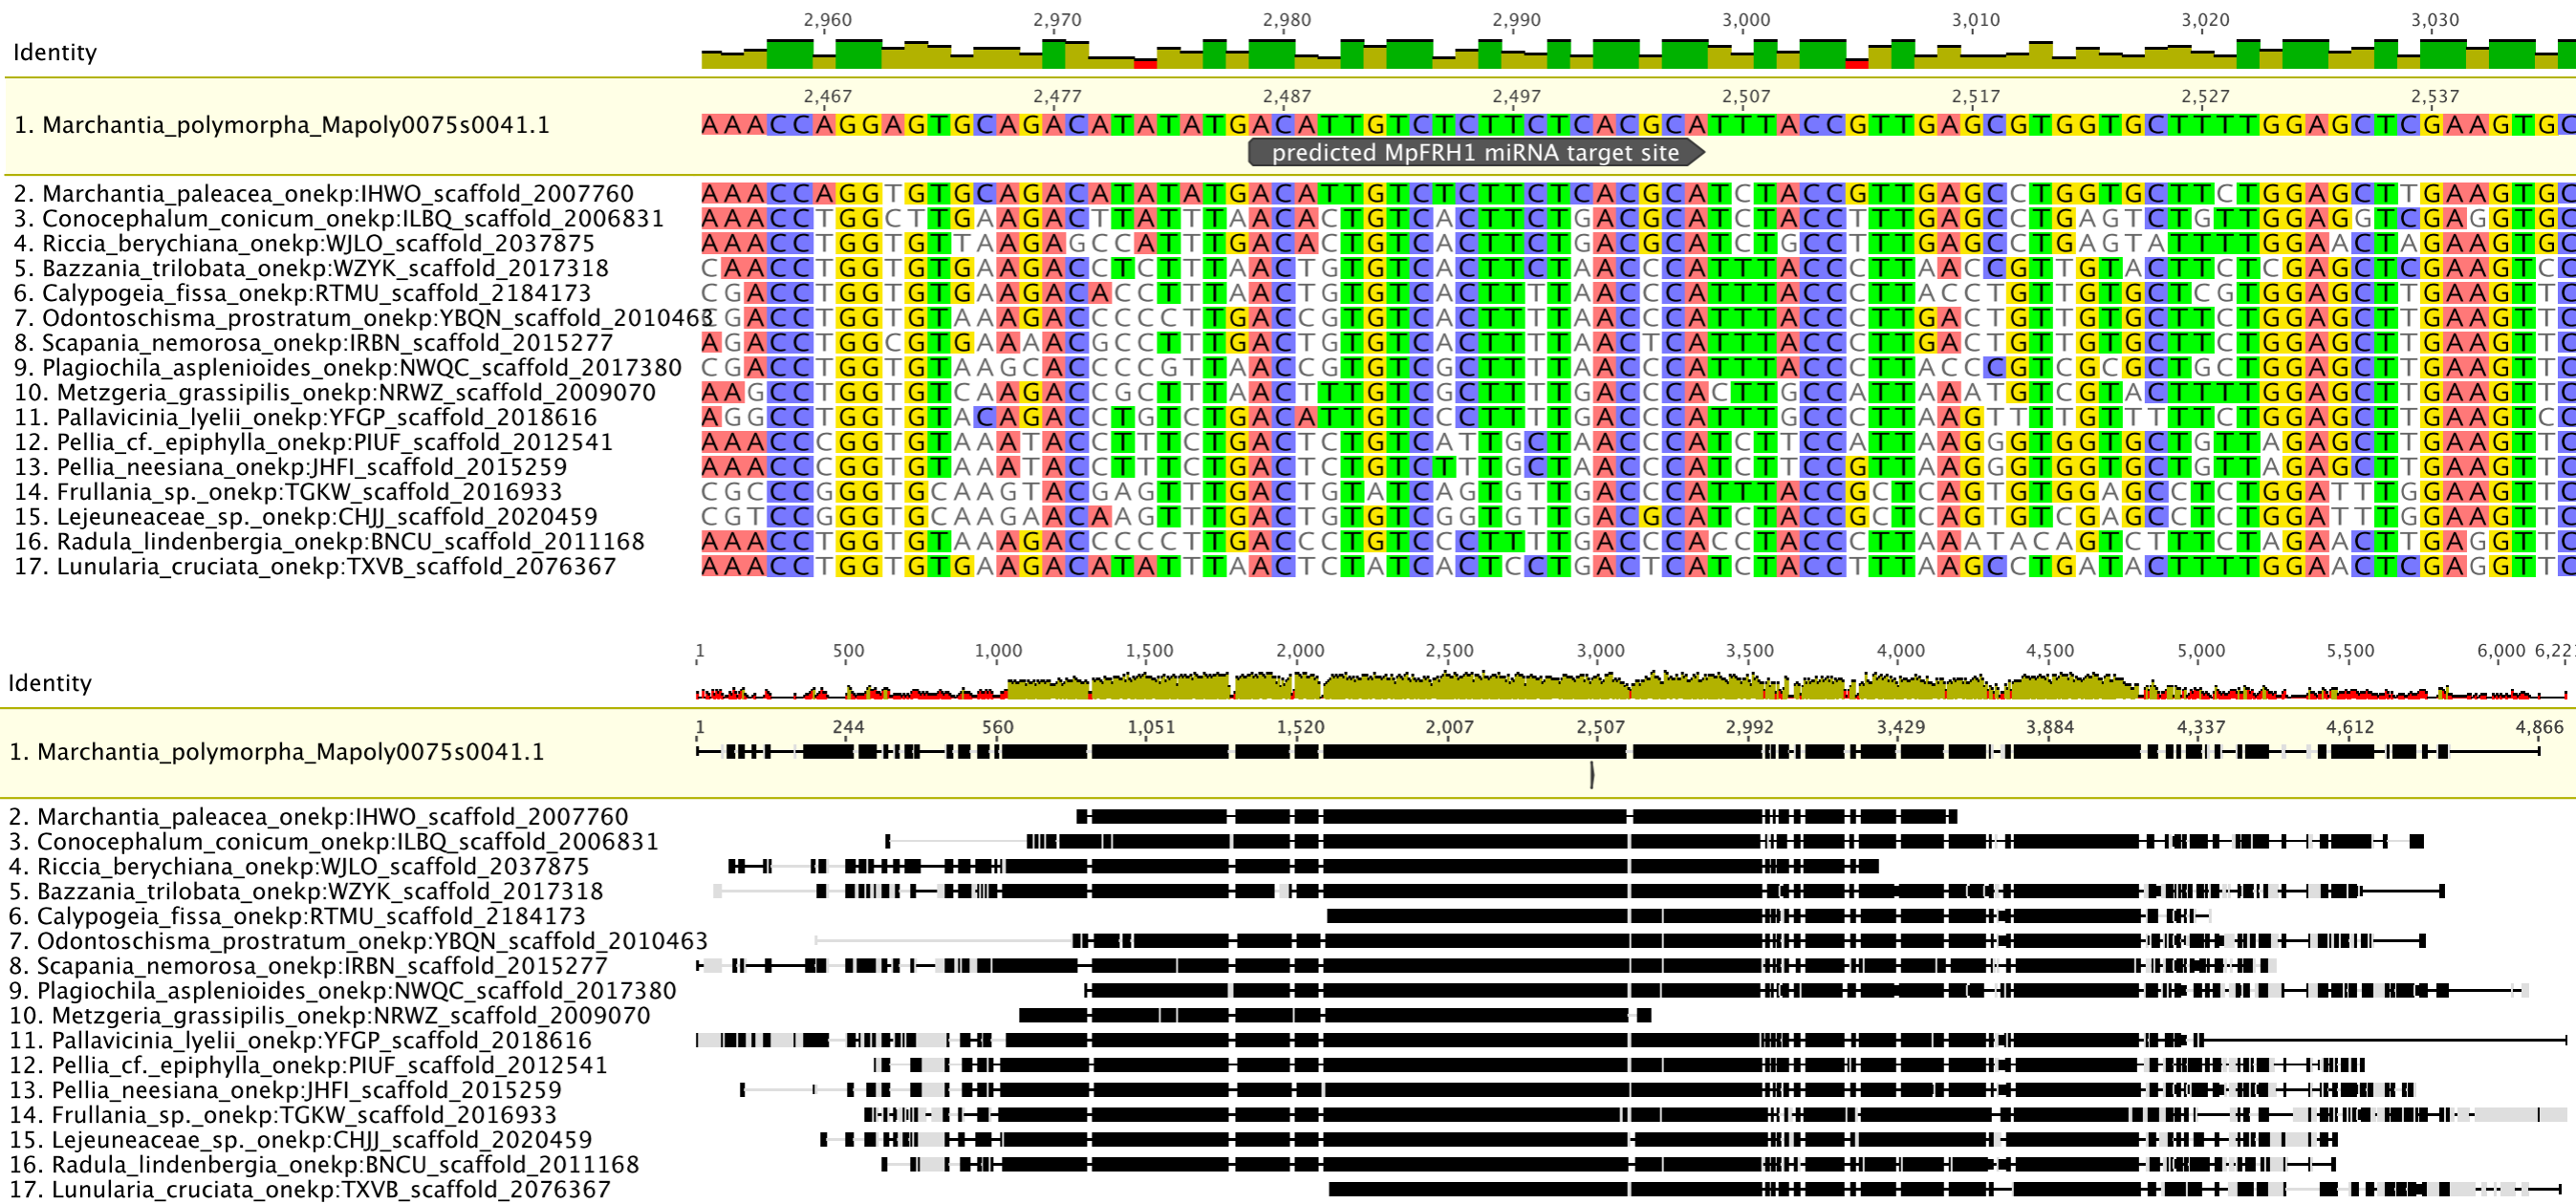

B

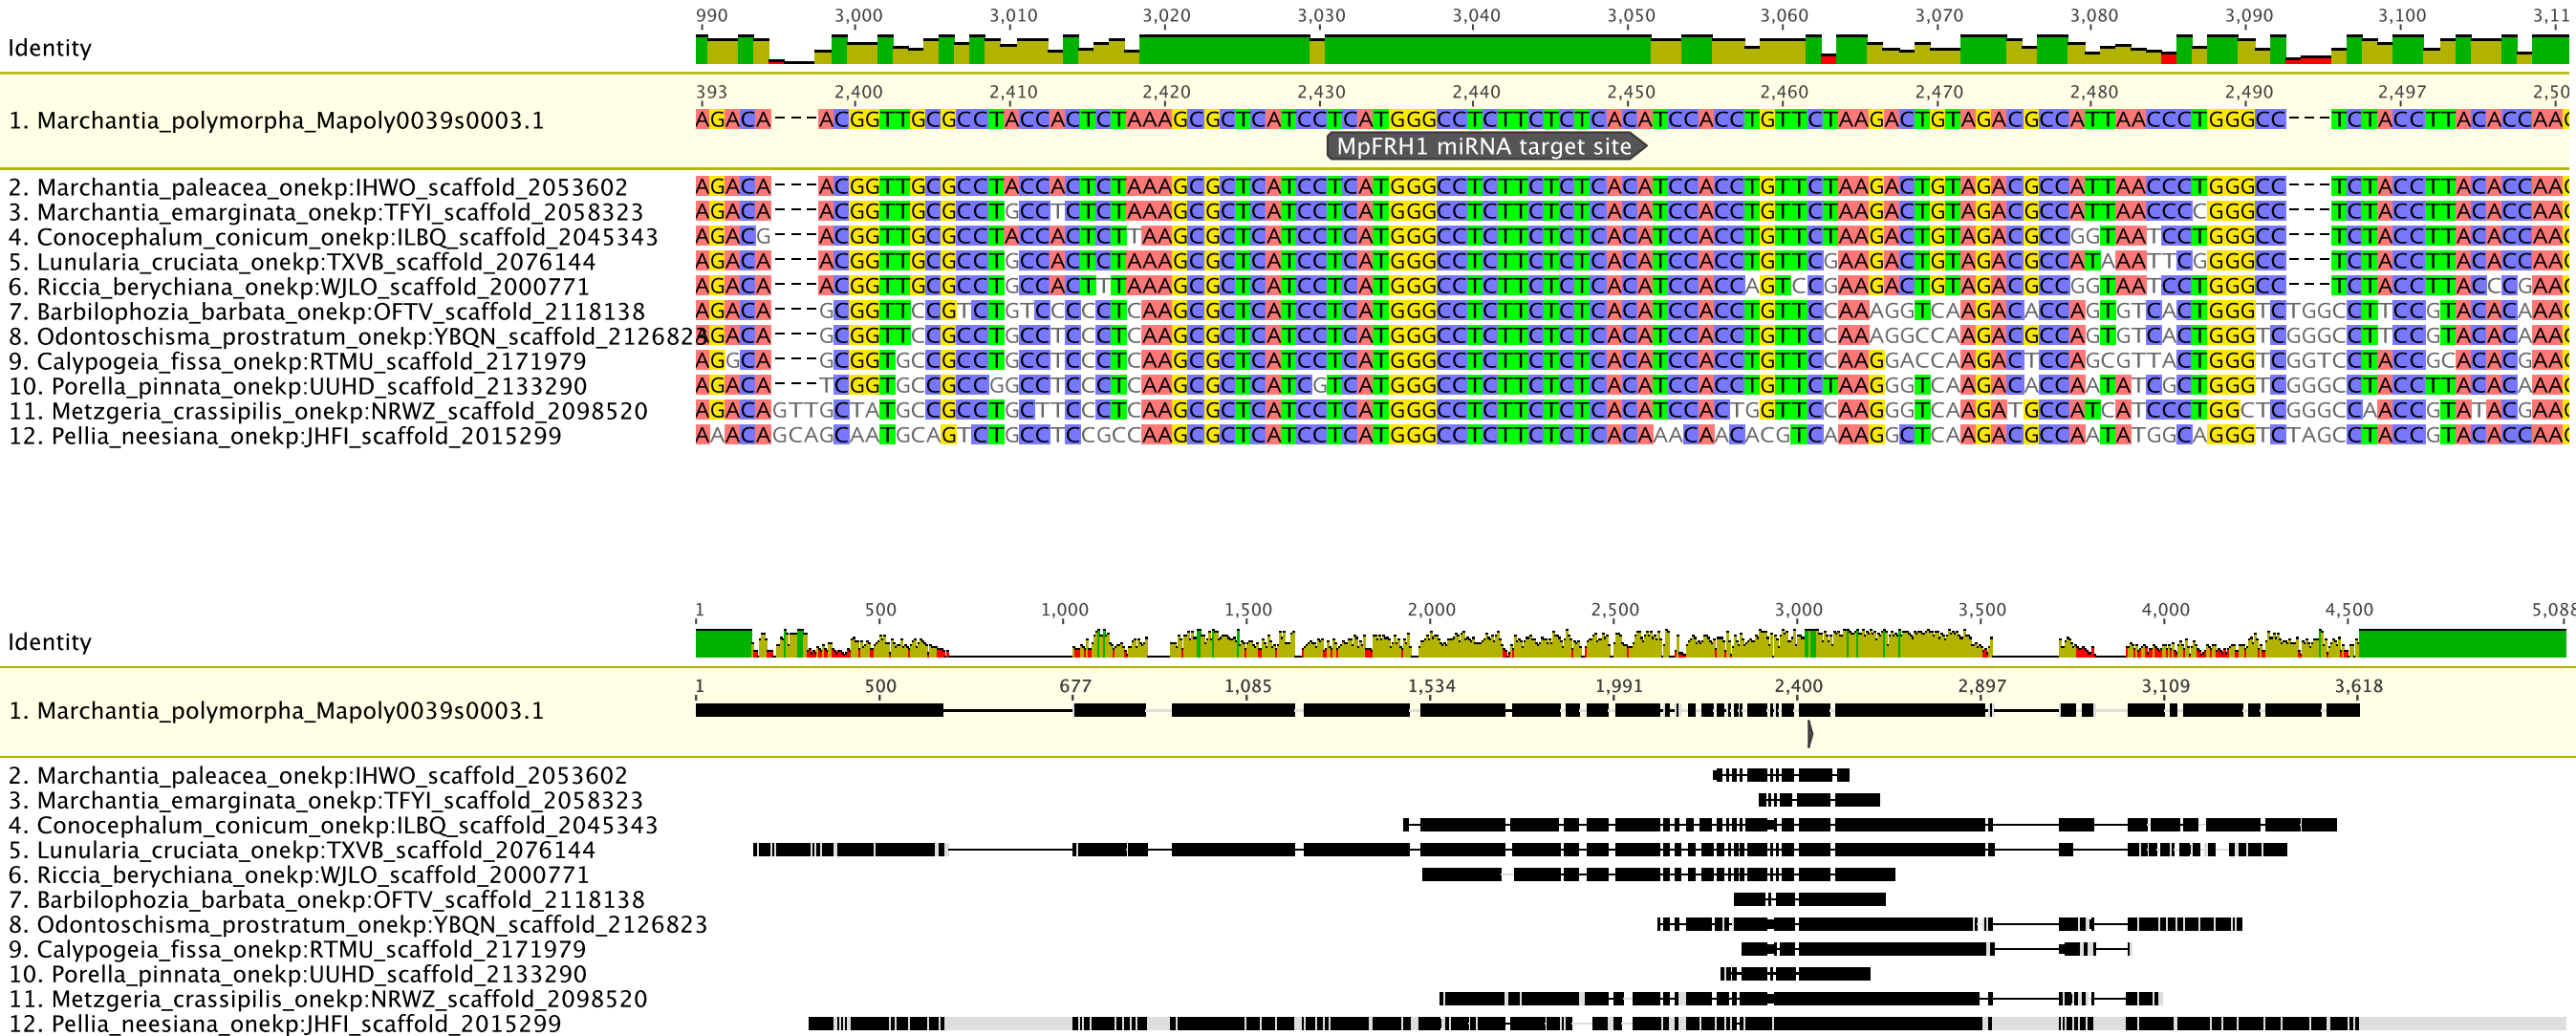

Identity

15001,0001,5002,0002,5003,0003,5004,0004,5005,088

1. Marchantia\_polymorpha\_Mapoly0039s0003.1

15006771,0851,5341,9912,4002,8973,1093,618

2. Marchantia\_paleacea\_onekp:IHOW\_scaffold\_2053602

|||||

3. Marchantia\_emarginata\_onekp:TFYI\_scaffold\_2058323

|||||

4. Conocephalum\_conicum\_onekp:ILBQ\_scaffold\_2045343

|||||

5. Lunularia\_cruciata\_onekp:TXVB\_scaffold\_2076144

|||||

6. Riccia\_berychiana\_onekp:WJLO\_scaffold\_2000771

|||||

7. Barbilophozia\_barbata\_onekp:OFTV\_scaffold\_2118138

|||||

8. Odontoschisma\_prostratum\_onekp:YBQN\_scaffold\_2126823

|||||

9. Calypogeia\_fissa\_onekp:RTMU\_scaffold\_2171979

|||||

10. Porella\_pinnata\_onekp:UUHD\_scaffold\_2133290

|||||

11. Metzgeria\_crassipilis\_onekp:NRWZ\_scaffold\_2098520

|||||

12. Pellia\_neesiana\_onekp:JHFI\_scaffold\_2015299

|||||

C

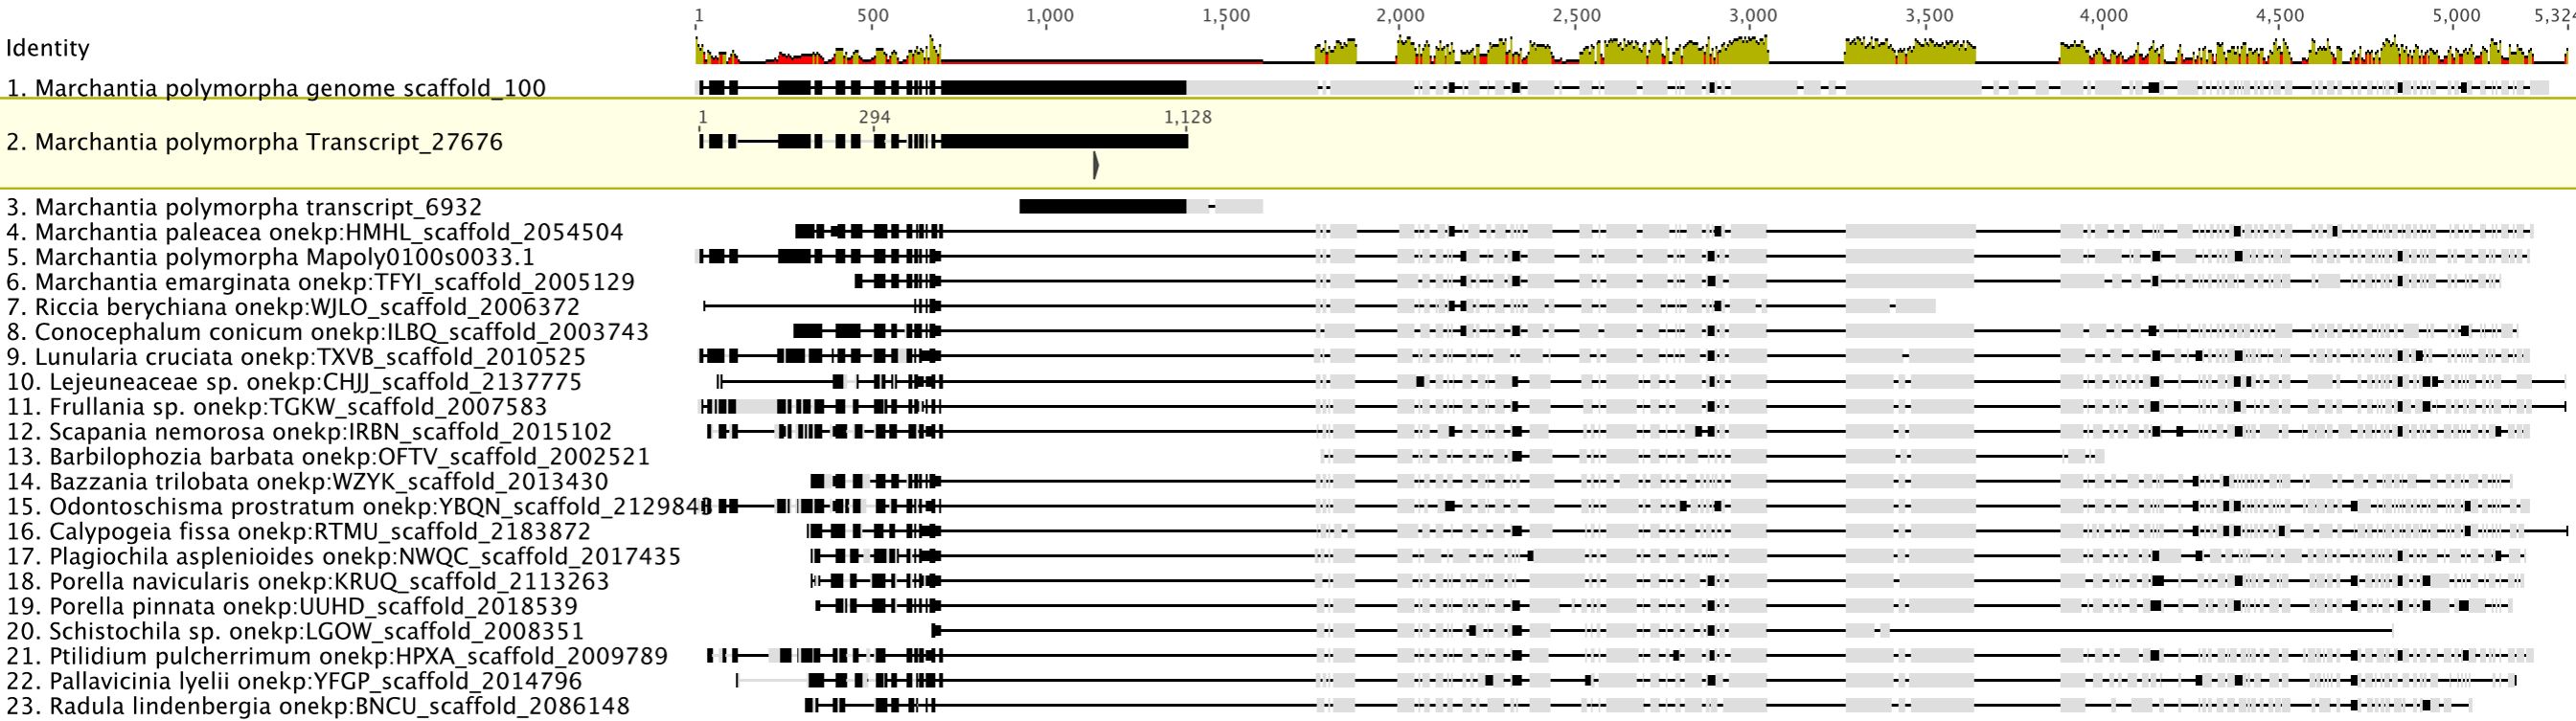

D

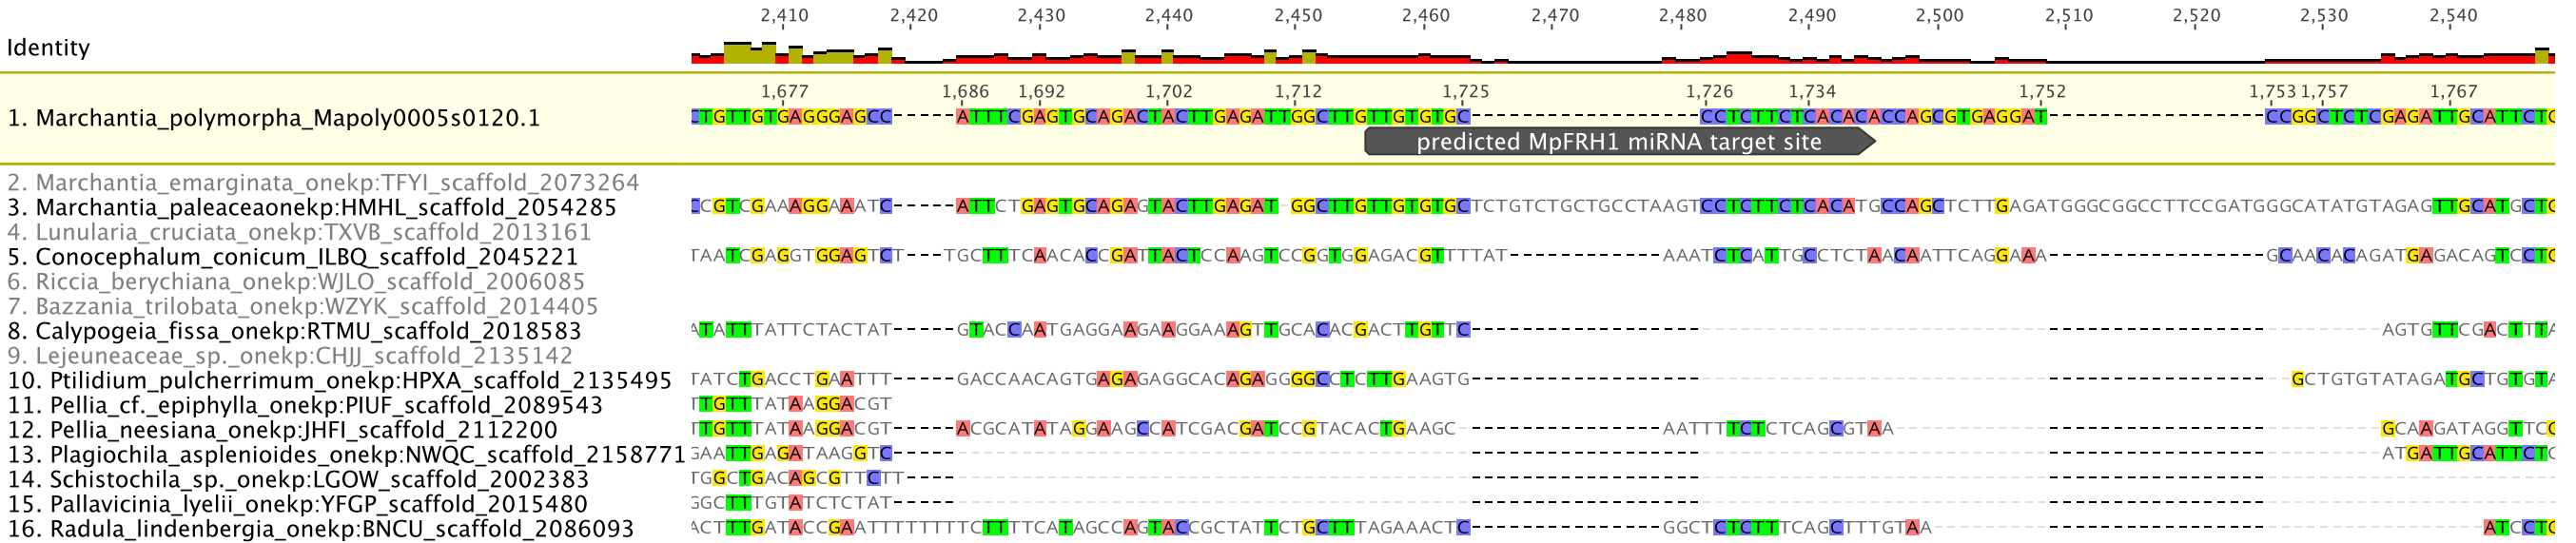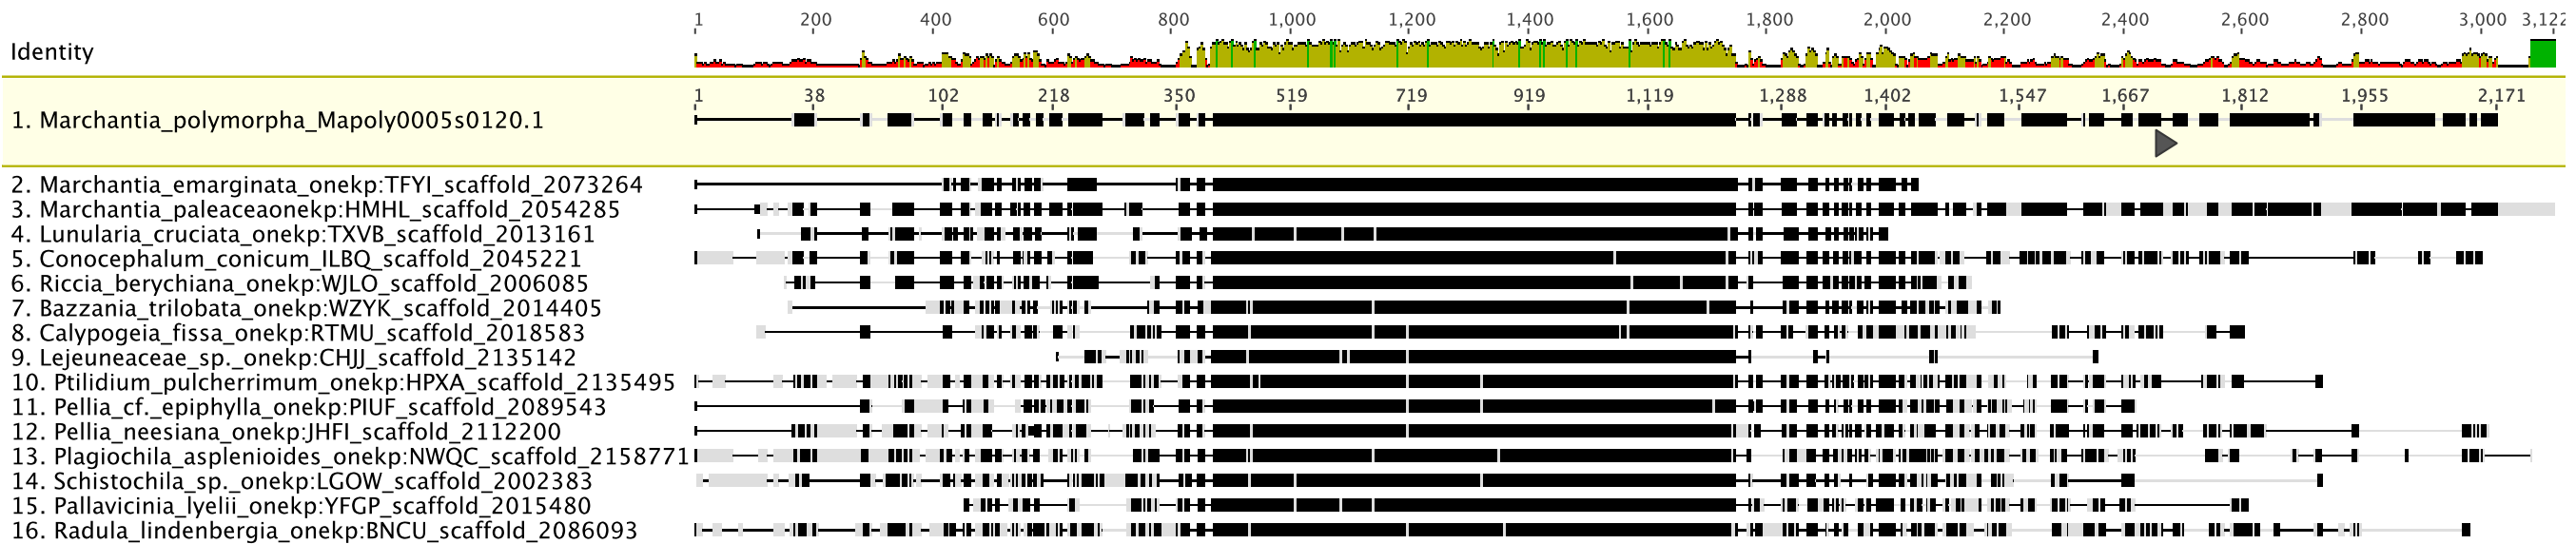

Supplement: supp [file elife-38529-supp-v1.zip › elife_poa_e38529_Supplementary_File_4.pdf]
