# Supplementary figures and images for: Negative regulation of conserved RSL class I bHLH transcription factors evolved independently among land plants
Source: eLife journal article supplement (doi:10.7554/elife.38529), 2018-08-23

**A**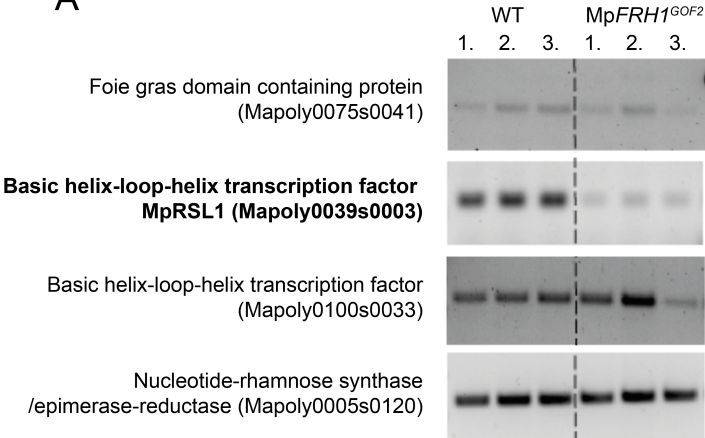**B**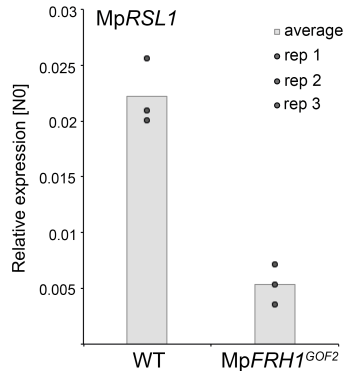

Supplement: supp [file elife-38529-supp-v1.zip]

*pro* *FRH1:3xYFP-NLS*

*pro* *IRE:3xYFP-NLS*

YFP

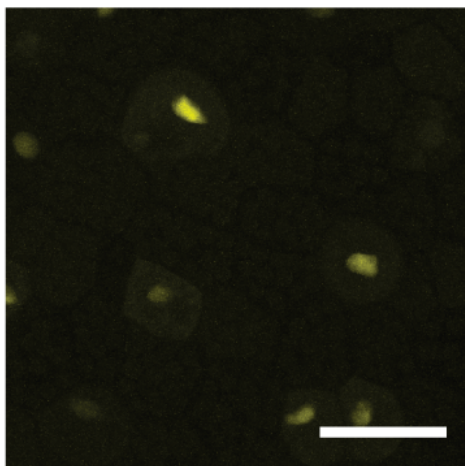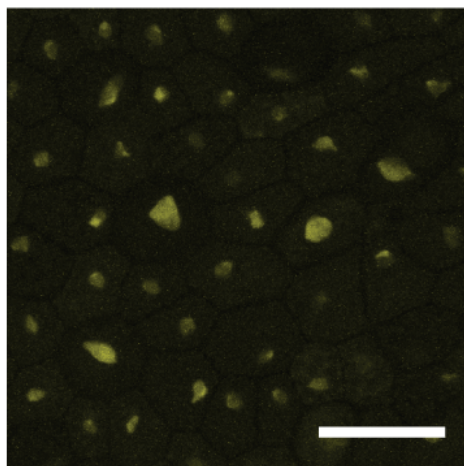

chlorophyll

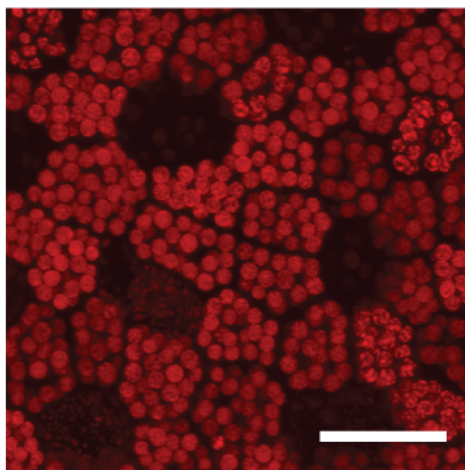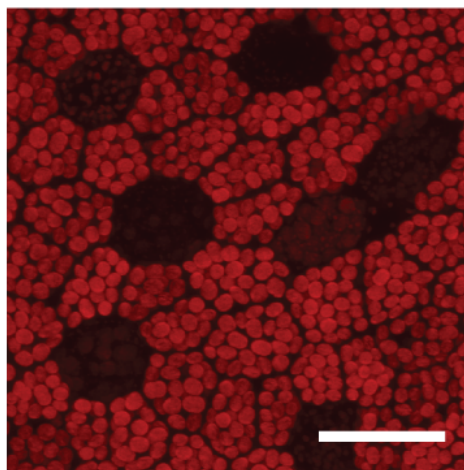

merge

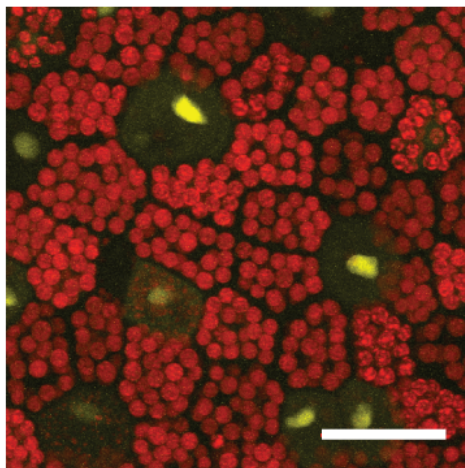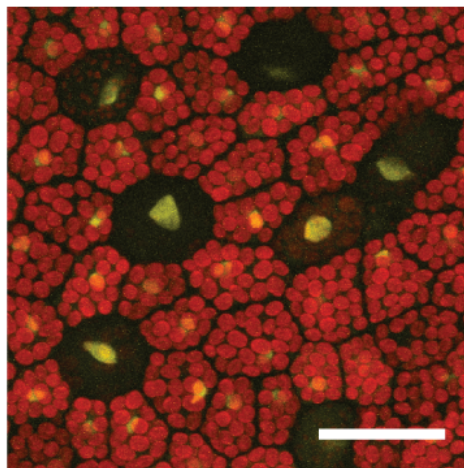

Supplement: supp [file elife-38529-supp-v1.zip › elife_poa_e38529_Figure_7_figure_supplement_1.pdf]

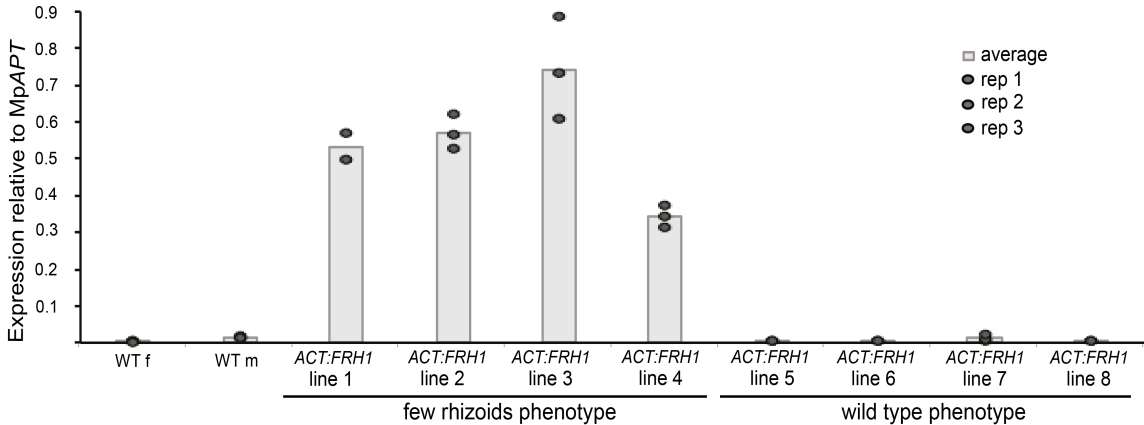

Supplement: supp [file elife-38529-supp-v1.zip › elife_poa_e38529_Figure_2_figure_supplement_1.pdf]
